# Supplementary material for: Inactivation of Planktonic Cells and Sessile Biofilm of Candida Auris by Aloe Emodin-mediated Antimicrobial Photodynamic Therapy
Source: Research Square preprint supplement (doi:10.21203/rs.3.rs-6614954/v1), 2025-06-19
Supplement: Supplementary file 1 [file 1670b8cd085700d95877cff1.docx]

**Supplementary Material**

**Figure S1 –** Determination of MIC and MBC of AE for susceptible and multiresistant bacterial strains and *C. auris*.


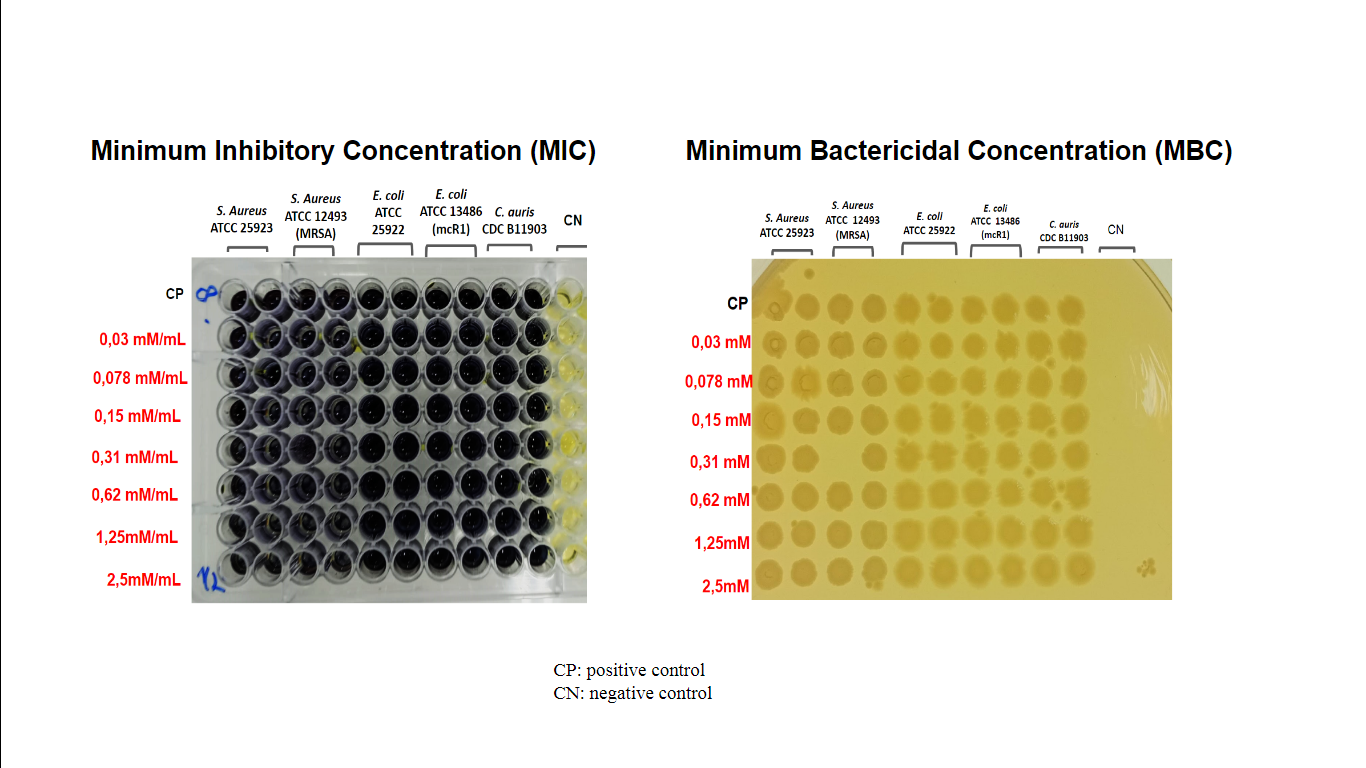

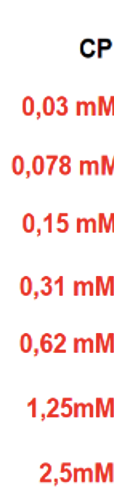


**Figure S2 -** Photodynamic activity of AEto planktonic cells under different conditions of light in triplicates.

**
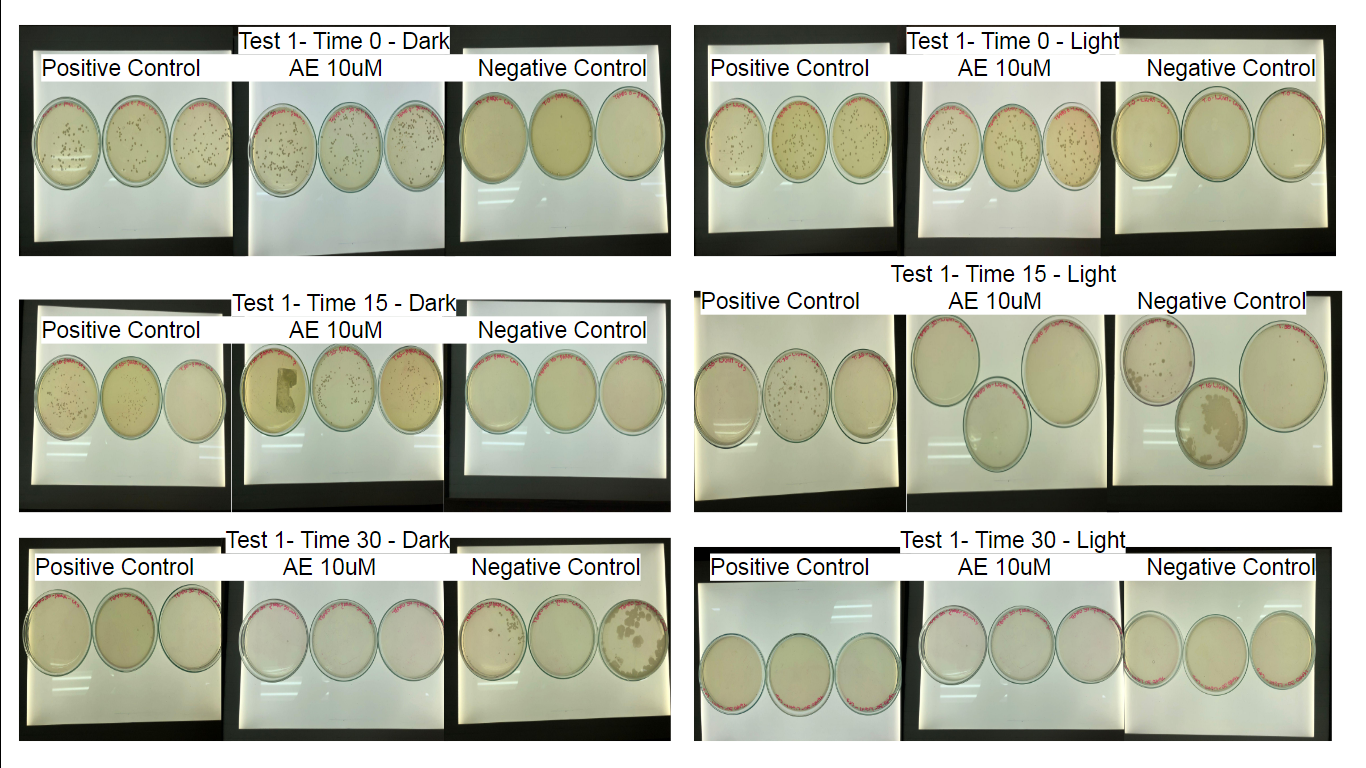
Triplicate 1**

**
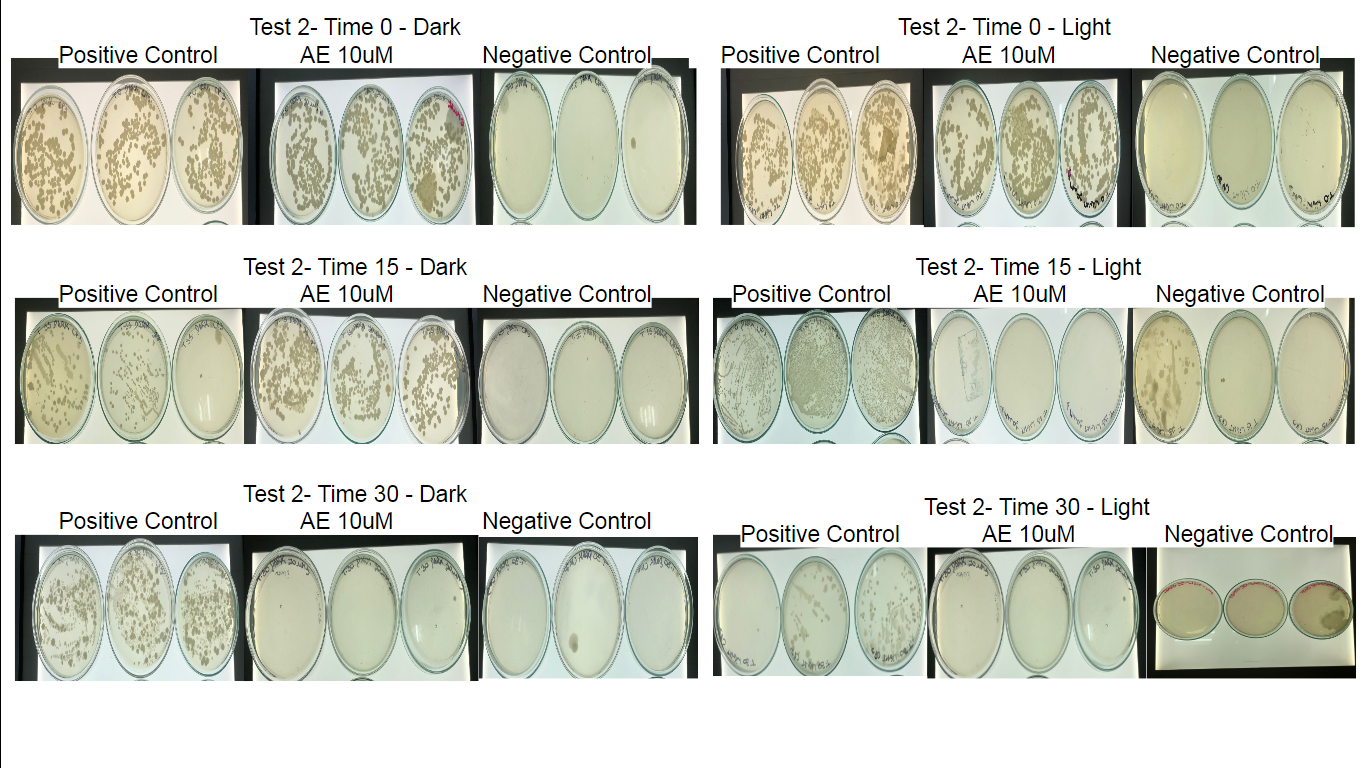
Triplicate 2**

**
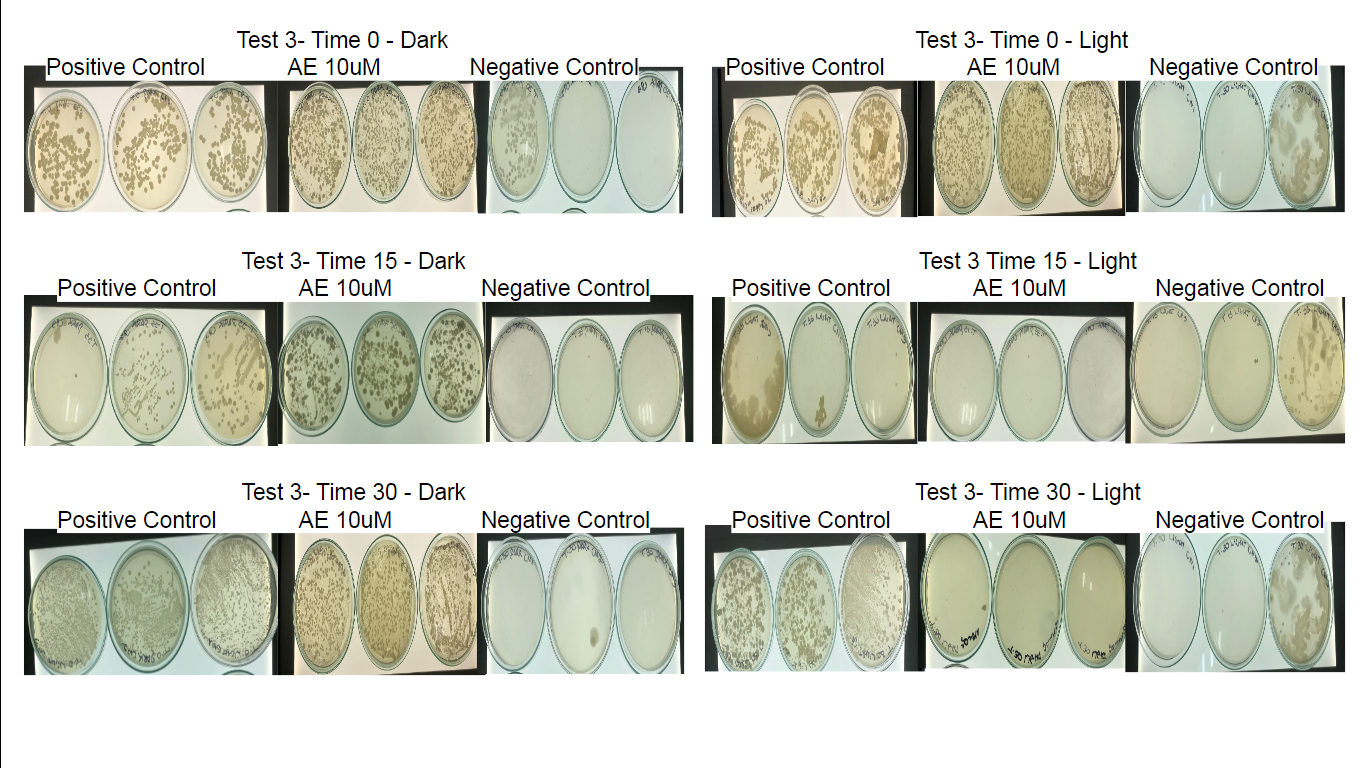
Triplicate 3**
